# Supplementary material for: Mycobacterium tuberculosis Type VII Secreted Effector EsxH Targets Host ESCRT to Impair Trafficking
Source: PLoS Pathog. 2013 Oct 31;9(10):e1003734. doi: 10.1371/journal.ppat.1003734 (PMC3814348; doi:10.1371/journal.ppat.1003734)
Supplement: Dataset S1 — Secretome collection screened. (XLS) [file ppat.1003734.s001.xls]

## Sheet: Secretome Set
Dataset S1. Secretome Collection Screened
Rv Number	Gene names/synonym	Found in CF	Predicted ss*	Secreted based upon fusion protein (phoA/b-lac)	SecA2-dependent or predicted Tat-dependent secretion, or Esx family member	Functional category from Tuberculist
Rv0012	Rv0012	CF	ss	phoA		3
Rv0019c	fhaB	CF				9
Rv0022c	whiB5/whmG	CF				9
Rv0024	Rv0024					0
Rv0078A	Rv0078A	CF				16
Rv0125	pepA/mtb32a	CF	ss	phoA		7
Rv0140	Rv0140	CF				10
Rv0157A	Rv0157A	CF				10
Rv0164	TB18.5	CF				10
Rv0169	mce1A	CF	ss			0
Rv0170	mce1B/mceD	CF	ss			0
Rv0171	mce1C	CF	ss			0
Rv0172	mce1D	CF	ss			0
Rv0173	lprK/mce1E	CF	ss			3
Rv0179c	lprO	CF	ss			3
Rv0187	Rv0187	CF				7
Rv0192A	Rv0192A	CF	ss	phoA		3
Rv0198c	zmp1	CF				7
Rv0199	Rv0199		ss			3
Rv0211	pckA/pckG/pck1	CF				7
Rv0216	Rv0216	CF				7
Rv0229c	Rv0229c	CF	ss			3
Rv0237	lpqI	CF	ss			3
Rv0265c	Rv0265c/fecB2	CF	ss		Tat dependent	3
Rv0274	Rv0274	CF				10
Rv0281	Rv0281	CF				10
Rv0287	esxG/TB9.8	CF			Esx	3
Rv0288	esxH/TB10.4	CF			Esx	3
Rv0309	Rv0309	CF	ss			3
Rv0315	Rv0315	CF	ss	phoA	Tat dependent	7
Rv0321	dcd/dus paxA	CF				7
Rv0340	Rv0340	CF				10
Rv0344c	lpqJ	CF	ss			3
Rv0360c	Rv0360c		ss			10
Rv0379	secE2	CF				3
Rv0390	Rv0390	CF			secA2-dependent	10
Rv0394c	Rv0394c		ss			3
Rv0398c	Rv0398c	CF	ss			3
Rv0403c	mmpS1	CF	ss			3
Rv0418	lpqL	CF	ss			3
Rv0419	lpqM	CF	ss			3
Rv0420c	Rv0420c		ss		Tat dependent	3
Rv0431	Rv0431	CF	ss	phoA		3
Rv0432	sodC	CF	ss			0
Rv0453	PPE11	CF				6
Rv0455c	Rv0455c	CF	ss			10
Rv0462	lpdC/TB49.2/CIP50	CF				7
Rv0467	icl1/icl/aceA	CF				7
Rv0472c	Rv0472c	CF				9
Rv0477	Rv0477	CF	ss			3
Rv0483	lprQ	CF	ss			3
Rv0490	senX3	CF	ss			9
Rv0503c	cmaA2/cma2	CF				1
Rv0506	mmpS2	CF	ss			3
Rv0518	Rv0518	CF				3
Rv0519c	Rv0519c	CF	ss			3
Rv0546c	Rv0546c	CF				10
Rv0549c	vapC3	CF				0
Rv0559c	Rv0559c	CF	ss			3
Rv0566c	Rv0566c	CF				10
Rv0569	Rv0569	CF				10
Rv0577	TB27.3/cfp32	CF				10
Rv0583c	lpqN	CF	ss			3
Rv0584	Rv0584		ss			3
Rv0590	Rv0584		ss	b-lac		0
Rv0592	mce2D		ss			0
Rv0603	Rv0603	CF	ss			3
Rv0605	Rv0605	CF				5
Rv0617	vapC29		ss			0
Rv0677c	mmpS5	CF	ss			3
Rv0680c	Rv0680c	CF	ss			3
Rv0730	Rv0730	CF				10
Rv0731c	Rv0731c	CF				10
Rv0765c	Rv0765c		ss		Tat dependent	7
Rv0774c	Rv0774c	CF	ss		Tat dependent	3
Rv0787	Rv0787	CF				16
Rv0821c	phoY2	CF				3
Rv0822c	Rv0822c	CF				10
Rv0831c	Rv0831c	CF				10
Rv0835	lpqQ	CF	ss			3
Rv0838	lpqR	CF	ss			3
Rv0846c	Rv0846c		ss		Tat dependent	7
Rv0854	Rv0854	CF				10
Rv0888	Rv0888	CF	ss			3
Rv0899	ompA/ompATb	CF	ss			3
Rv0903c	prrA	CF				9
Rv0913c	Rv0913c	CF				7
Rv0928	pstS3/phoS2	CF	ss			3
Rv0932c	pstS2	CF	ss			3
Rv0934	pstS1/phoS1/phoS	CF	ss	phoA		3
Rv0942	Rv0942		ss		Tat dependent	16
Rv0983	pepD/mtb32b	CF				7
Rv0988	Rv0988	CF	ss			3
Rv0999	Rv0999	CF	ss			16
Rv1016c	lpqT	CF	ss			3
Rv1031	kdpC		ss		Tat dependent	3
Rv1062	Rv1062		ss		Tat dependent	10
Rv1075c	Rv1075c	CF	ss		Tat dependent	3
Rv1079	metB	CF				7
Rv1093	glyA1/glyA	CF				7
Rv1097c	Rv1097c	CF				3
Rv1158c	Rv1158c	CF	ss			10
Rv1159A	Rv1159A	CF				16
Rv1174c	TB8.4	CF	ss			3
Rv1196	PPE18/mtb39a	CF				6
Rv1198	esxL/ES6_4Mtb9.9C	CF			Esx	3
Rv1228	lpqX	CF	ss			3
Rv1235	lpqY	CF	ss			3
Rv1242	vapC33		ss			0
Rv1252c	lprE	CF	ss			3
Rv1268c	Rv1268c		ss	phoA		16
Rv1269c	Rv1269c	CF	ss	phoA		3
Rv1270c	lprA	CF	ss			3
Rv1271c	Rv1271c		ss			3
Rv1275	lprC	CF	ss			3
Rv1291c	Rv1291c		ss			3
Rv1312	Rv1312		ss			3
Rv1314c	Rv1314c	CF				10
Rv1323	fadA4	CF				1
Rv1330c	pncB1	CF				10
Rv1335	cysO/cfp10A	CF				10
Rv1351	Rv1351	CF	ss			16
Rv1352	Rv1352	CF	ss			10
Rv1368	lprF	CF	ss			3
Rv1386	PE15	CF	ss			6
Rv1411c	lprG/P27	CF	ss			3
Rv1419	Rv1419	CF	ss			16
Rv1435c	Rv1435c	CF	ss	b-lac		3
Rv1478	Rv1478		ss			0
Rv1488	Rv1488	CF	ss			3
Rv1498A	Rv1498A	CF				10
Rv1531	Rv1531	CF				10
Rv1536	ileS	CF				2
Rv1541c	lprI	CF	ss			3
Rv1558	Rv1558	CF				10
Rv1566c	Rv1566c	CF	ss	phoA		0
Rv1636	TB15.3	CF				10
Rv1637c	Rv1637c	CF				10
Rv1684	Rv1684	CF				10
Rv1698	mctB	CF	ss			10
Rv1729c	Rv1729c	CF				10
Rv1732c	Rv1732c	CF	ss			10
Rv1733c	Rv1733c	CF	ss			3
Rv1746	pknF	CF				9
Rv1754c	Rv1754c	CF				10
Rv1782	eccB5	CF				3
Rv1793	esxN/ES6_5Mtb9.9A	CF			Esx	3
Rv1794	Rv1794	CF				10
Rv1799	lppT	CF	ss			3
Rv1804c	Rv1804c	CF	ss			10
Rv1810	Rv1810	CF	ss	phoA		10
Rv1813c	Rv1813c		ss		Tat dependent	10
Rv1815	Rv1815	CF	ss			10
Rv1817	Rv1817	CF				7
Rv1825	Rv1825	CF				10
Rv1827	garA/cfp17	CF				10
Rv1836c	Rv1836c	CF				10
Rv1884c	rpfC	CF				3
Rv1885c	Rv1885c/*MtCM	CF	ss			10
Rv1886c	fbpB/mtp59 85b	CF	ss	phoA		1
Rv1887	Rv1887	CF				16
Rv1891	Rv1891	CF	ss			10
Rv1893	Rv1893	CF				10
Rv1899c	lppD	CF	ss			3
Rv1906c	Rv1906c	CF	ss	phoA		10
Rv1908c	katG	CF			secA2-dependent	0
Rv1910c	Rv1910c	CF	ss	phoA		3
Rv1911c	lppC	CF	ss			3
Rv1922	Rv1922	CF	ss			3
Rv1926c	mpt63/mpb63	CF	ss	phoA		3
Rv1932	tpx/cfp20	CF				0
Rv1938	ephB	CF				0
Rv1974	Rv1974		ss			3
Rv1980c	mpt64/mpb64	CF	ss	phoA		3
Rv1984c	cfp21/culp1 clp1	CF	ss			3
Rv1987	Rv1987	CF	ss			3
Rv1989c	Rv1989c	CF				16
Rv2015c	Rv2015c	CF				10
Rv2031c	hspX/acr	CF				0
Rv2035	Rv2035	CF				10
Rv2068c	blaC	CF	ss		Tat dependent	7
Rv2074	Rv2074	CF				10
Rv2075c	Rv2075c	CF	ss			3
Rv2080	lppJ	CF	ss			3
Rv2140c	TB18.6	CF				10
Rv2204c	Rv2204c	CF				10
Rv2212	Rv2212	CF				10
Rv2234	ptpA/MPtpA					9
Rv2238c	ahpE	CF				0
Rv2240c	Rv2240c	CF				16
Rv2253	Rv2253	CF	ss	phoA		3
Rv2258c	Rv2258c	CF				9
Rv2277c	Rv2277c		ss	phoA		7
Rv2289	cdh	CF	ss			1
Rv2290	lppO	CF	ss	phoA		3
Rv2297	Rv2297	CF	ss			16
Rv2302	Rv2302	CF				10
Rv2346c	esxO/ES6_6Mtb9.9E	CF			Esx	3
Rv2347c	esxP/ES6_7QILSS	CF			Esx	3
Rv2349c	plcC		ss		Tat dependent	7
Rv2350c	plcB/mpcB		ss		Tat dependent	7
Rv2351c	plcA/mpcA		ss		Tat dependent	7
Rv2352c	PPE38	CF				6
Rv2376c	cfp2/mtb12	CF	ss	phoA		3
Rv2389c	rpfD		ss			3
Rv2390c	Rv2390c		ss			10
Rv2396	PE_PGRS41/aprC		ss			6
Rv2401	Rv2401	CF				16
Rv2416c	eis	CF				0
Rv2429	ahpD	CF				0
Rv2430c	PPE41	CF				6
Rv2431c	PE25	CF				6
Rv2445c	ndkA/ndk	CF				7
Rv2462c	tig	CF				3
Rv2469c	Rv2469c	CF	ss			10
Rv2491	Rv2491				Tat dependent	10
Rv2525c	Rv2525c	CF	ss		Tat dependent	10
Rv2544	lppB	CF				3
Rv2575	Rv2575	CF	ss			3
Rv2602	vapC41	CF				0
Rv2603c	Rv2603c	CF				10
Rv2626c	hrp1	CF				10
Rv2668	Rv2668	CF	ss			3
Rv2672	Rv2672	CF	ss			7
Rv2676c	Rv2676c	CF				10
Rv2691	ceoB/trkA	CF				3
Rv2716	Rv2716	CF				10
Rv2721c	Rv2721c	CF	ss			3
Rv2749	Rv2749	CF				10
Rv2752c	Rv2752c	CF				10
Rv2790c	ltp1	CF				3
Rv2799	Rv2799	CF	ss			3
Rv2823c	Rv2823c	CF				10
Rv2844	Rv2844	CF				10
Rv2864c	Rv2864c	CF	ss			3
Rv2873	mpt83/mpb83	CF	ss			3
Rv2875	mpt70/mpb70	CF	ss			3
Rv2878c	mpt53/dsbE	CF	ss	phoA		3
Rv2905	lppW	CF	ss			3
Rv2911	dacB2/dacB	CF	ss			3
Rv2941	fadD28/acoas	CF				1
Rv2945c	lppX	CF	ss			3
Rv2972c	Rv2972c		ss		Tat dependent	3
Rv2980	Rv2980		ss			3
Rv2991	Rv2991	CF				10
Rv3004	cfp6	CF	ss			3
Rv3006	lppZ	CF	ss			3
Rv3013	Rv3013		ss			10
Rv3016	lpqA	CF	ss			3
Rv3019c	esxR/ES6_9TB10.3				Esx	3
Rv3020c	esxS/PE28				Esx	3
Rv3033	Rv3033	CF	ss	phoA		16
Rv3036c	TB22.2	CF	ss	phoA		3
Rv3044	fecB	CF	ss			3
Rv3046c	Rv3046c	CF				10
Rv3061c	fadE22	CF				1
Rv3067	Rv3067	CF	ss			10
Rv3075c	Rv3075c	CF				10
Rv3096	Rv3096	CF	ss		Tat dependent	10
Rv3097c	lipY/PE_PGRS63		ss			6
Rv3106	fprA	CF	ss			7
Rv3133c	devR/dosR	CF				9
Rv3136	Rv3136	CF				6
Rv3163c	Rv3163c		ss			3
Rv3169	Rv3169	CF				10
Rv3170	aofH		ss			7
Rv3194c	Rv3194c	CF	ss			3
Rv3207c	Rv3207c	CF	ss			10
Rv3208A	TB9.4	CF				10
Rv3210c	Rv3210c	CF				10
Rv3212	Rv3212	CF	ss			10
Rv3246c	mtrA	CF				9
Rv3269	Rv3269	CF				0
Rv3304	Rv3304	CF				10
Rv3310	sapM	CF	ss	phoA		3
Rv3312A	Rv3312A		ss			3
Rv3330	dacB1	CF	ss			3
Rv3333c	Rv3333c		ss			16
Rv3353c	Rv3353c		ss		Tat dependent	10
Rv3354	Rv3354	CF	ss			10
Rv3369	Rv3369	CF				10
Rv3390	lpqD	CF	ss			3
Rv3395A	Rv3395A	CF	ss			3
Rv3400	Rv3400	CF				7
Rv3402c	Rv3402c	CF				3
Rv3413c	Rv3413c	CF				16
Rv3428c	Rv3428c	CF				5
Rv3444c	esxT				Esx	3
Rv3445c	esxU				Esx	3
Rv3449	mycP4		ss			7
Rv3451	cut3/culp3 clp3	CF	ss			3
Rv3477	PE31	CF				6
Rv3483c	Rv3483c		ss			3
Rv3484	cpsA	CF	ss			10
Rv3491	Rv3491	CF	ss			16
Rv3492c	Rv3492c		ss	phoA		10
Rv3494c	mce4F	CF	ss			0
Rv3495c	lprN/mce4E	CF	ss			3
Rv3496c	mce4D	CF	ss			0
Rv3518c	cyp142	CF				7
Rv3524	Rv3524	CF				3
Rv3534c	hsaF	CF				7
Rv3545c	cyp125	CF				3
Rv3556c	fadA6	CF				1
Rv3572	Rv3572	CF	ss			16
Rv3584	lpqE	CF	ss			3
Rv3587c	Rv3587c	CF	ss			3
Rv3592	mhuD/TB11.2	CF				10
Rv3615c	espC/snm9	CF				10
Rv3616c	espA					10
Rv3620c	esxW/ES6_10QILSS	CF			Esx	3
Rv3668c	Rv3668c	CF	ss	phoA		7
Rv3678c	Rv3678c	CF				10
Rv3686c	Rv3686c		ss			10
Rv3699	Rv3699	CF	ss			10
Rv3705c	Rv3705c	CF	ss			10
Rv3716c	Rv3716c	CF				10
Rv3717	Rv3717	CF	ss			10
Rv3759c	proX	CF	ss	b-lac		0
Rv3763	lpqH	CF	ss	phoA		3
Rv3786c	Rv3786c	CF				16
Rv3796	Rv3796/atsH		ss		Tat dependent	10
Rv3803c	fbpD/mpt51/mpb51/fbpC1	CF	ss			1
Rv3804c	fbpA/mpt44 85A	CF	ss			1
Rv3810	pirG/erp P36		ss	phoA		3
Rv3841	bfrB	CF				7
Rv3846	sodA/sodB sod	CF			secA2-dependent	0
Rv3849	espR	CF				16
Rv3853	rraA/menG	CF				9
Rv3865	espF	CF				10
Rv3869	eccB1/snm6	CF	ss			3
Rv3872	PE35	CF				6
Rv3874	esxB/lhp/cfp10	CF			Esx	3
Rv3875	esxA/esat-6	CF			Esx	3
Rv3881c	espB	CF				10
Rv3890	esxC/ES6_11				Esx	3
Rv3891	esxD				Esx	3
Rv3901c	Rv3901c	CF	ss			3
Rv3904	esxE/ES6_12				Esx	3
Mtb ORFs that were screened for interactions with human ORFs. Proteins identified as secreted from the literature are listed along with annotation as to whether they have been found in culture filtrate (CF), have predicted signal sequences (ss), are secreted based upon phoA or b-lac fusions, whether they exhibit SecA2-dependent or TAT-dependent secretion, or are Esx family members. Their function…
